# Supplementary material
Source: Springer Nature journal article supplement (https://www.springermedizin.de/resource/supplementary/12885_2010_2573_MOESM1_ESM.pdf/9462598)

(a) *PXR*

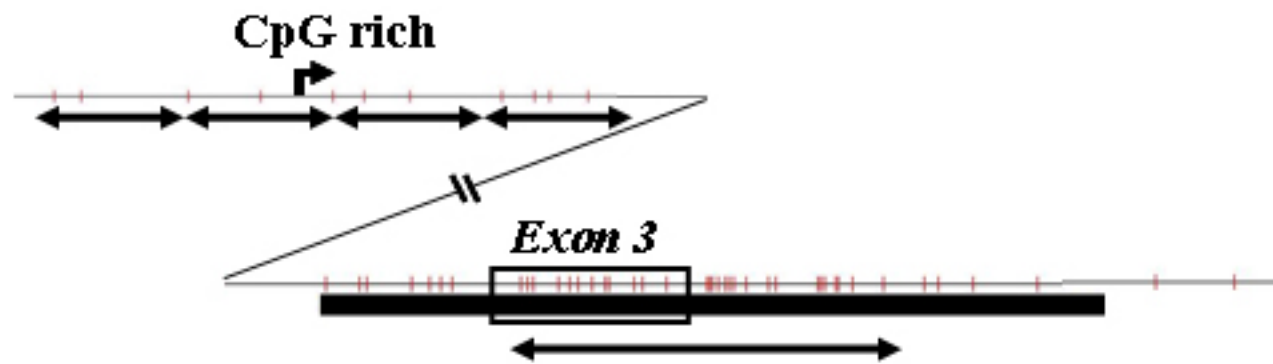

(b) *CYP3A4*

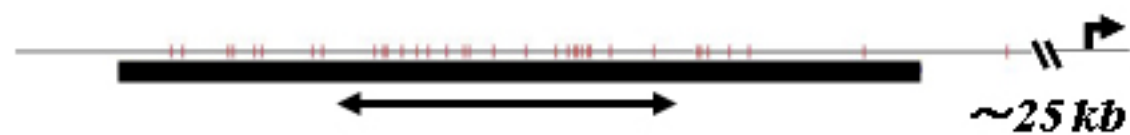

(c) *VDR*

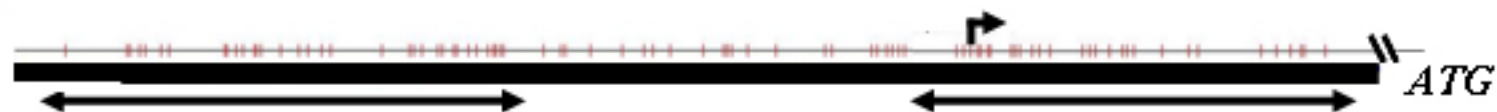

(d) *PRMT1*

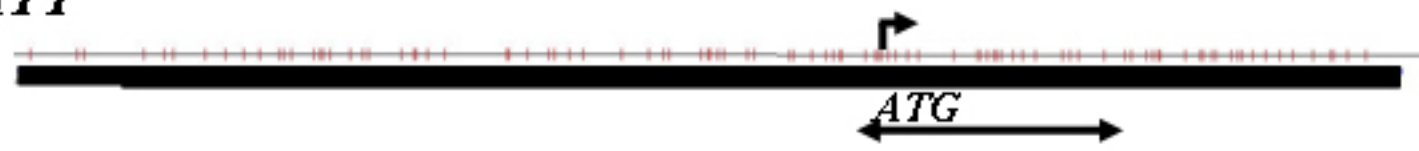

Supplement: MOESM1 [file 9462598]
